# Supplementary material for: Recyclable Adsorbents for Potash Brine Desalination Based on Silicate Powder: Application, Regeneration and Utilization
Source: MDPI journal article supplement (doi:10.3390/colloids7040061), 2023-10-11
Supplement: s1 [file s1]

Table S1 XRD peaks of raw silica (S) and acid-treated silica (AS)

| S             |            |                     | AS            |             |                     | Phase       |
|---------------|------------|---------------------|---------------|-------------|---------------------|-------------|
| $2\theta$ (°) | $d$ (Å)    | Intensity (cps deg) | $2\theta$ (°) | $d$ (Å)     | Intensity (cps deg) |             |
| 6.396(4)      | 13.807(10) | 126(11)             | 6.380(10)     | 13.84(2)    | 124(8)              | Clinochlore |
| 9.046(3)      | 9.768(3)   | 342(11)             | 9.025(8)      | 9.791(8)    | 550(15)             | KMgAlSiOH   |
| 10.615(16)    | 8.328(13)  | 31(7)               | 10.655(8)     | 8.296(6)    | 40(9)               | Albite      |
| 12.662(9)     | 6.985(5)   | 312(7)              | 12.647(7)     | 6.994(4)    | 430(11)             | Clinochlore |
| 13.983(4)     | 6.328(2)   | 35(7)               | 14.017(4)     | 6.3130(19)  | 76(10)              | Albite      |
| 17.967(8)     | 4.933(2)   | 141(12)             | 17.939(14)    | 4.941(4)    | 229(11)             | KMgAlSiOH   |
| 18.37(11)     | 4.83(3)    | 92(93)              | -             | -           | -                   | KMgAlSiOH   |
| 18.962(10)    | 4.676(3)   | 104(15)             | 18.947(11)    | 4.680(3)    | 156(9)              | Clinochlore |
| 19.93(3)      | 4.450(7)   | 367(56)             | 19.95(4)      | 4.448(9)    | 309(19)             | KMgAlSiOH   |
| 21.007(3)     | 4.2255(7)  | 589(10)             | 20.994(3)     | 4.2282(6)   | 725(15)             | Albite      |
| 22.193(12)    | 4.002(2)   | 136(10)             | 22.151(5)     | 4.0098(9)   | 211(9)              | Albite      |
| 23.227(14)    | 3.827(2)   | 160(12)             | 23.185(11)    | 3.8333(17)  | 50(9)               | Calcite     |
| 23.668(9)     | 3.7561(15) | 143(10)             | 23.679(11)    | 3.7544(18)  | 175(13)             | Albite      |
| 24.38(4)      | 3.648(6)   | 160(25)             | 24.381(14)    | 3.648(2)    | 183(16)             | Albite      |
| 25.313(12)    | 3.5156(17) | 165(11)             | 25.26(2)      | 3.522(3)    | 534(27)             | Clinochlore |
| 25.57(8)      | 3.481(11)  | 242(34)             | -             | -           | -                   | KMgAlSiOH   |
| 26.777(6)     | 3.3267(7)  | 3644(99)            | 26.7694(13)   | 3.32759(16) | 5029(98)            | Quartz      |
| 27.610(4)     | 3.2282(5)  | 231(35)             | 26.977(15)    | 3.3024(18)  | 769(86)             | Albite      |
| 28.072(7)     | 3.1761(8)  | 913(80)             | 27.598(13)    | 3.2295(15)  | 566(29)             | Albite      |
| 28.29(9)      | 3.152(10)  | 518(104)            | 28.055(7)     | 3.1779(8)   | 2044(41)            | Albite      |
| 29.573(3)     | 3.0182(3)  | 1413(22)            | 29.97(3)      | 2.979(3)    | 549(57)             | KMgAlSiOH   |
| 30.01(2)      | 2.975(2)   | 60(15)              | 30.634(5)     | 2.9160(5)   | 107(21)             | Albite      |
| 30.379(17)    | 2.9399(16) | 109(24)             | -             | -           | -                   | Albite      |
| 30.588(14)    | 2.9203(13) | 105(9)              | -             | -           | -                   | Albite      |

|            |             |         |            |             |         |             |
|------------|-------------|---------|------------|-------------|---------|-------------|
| 31.082(9)  | 2.8750(8)   | 445(13) | -          | -           | -       | Albite      |
| 31.385(9)  | 2.8480(8)   | 24(12)  | 31.336(15) | 2.8523(13)  | 113(25) | Clinochlore |
| 31.67(5)   | 2.823(5)    | 95(22)  | 31.721(14) | 2.8185(12)  | 59(18)  | Albite      |
| 32.18(4)   | 2.780(3)    | 45(17)  | -          | -           | -       | KMgAlSiOH   |
| 32.389(12) | 2.7619(10)  | 8(6)    | -          | -           | -       | Albite      |
| 33.210(19) | 2.6955(15)  | 26(8)   | -          | -           | -       | Albite      |
| 34.69(3)   | 2.584(2)    | 173(54) | -          | -           | -       | KMgAlSiOH   |
| 35.09(3)   | 2.555(2)    | 606(60) | 35.212(12) | 2.5467(9)   | 607(29) | Albite      |
| 36.144(8)  | 2.4831(5)   | 271(14) | 36.15(7)   | 2.482(4)    | 259(34) | Calcite     |
| 36.687(4)  | 2.4476(3)   | 445(13) | 36.681(5)  | 2.4480(3)   | 466(17) | Quartz      |
| 37.836(13) | 2.3759(8)   | 297(21) | 37.75(3)   | 2.3809(17)  | 202(18) | Albite      |
| 39.595(5)  | 2.2743(3)   | 668(14) | 39.593(4)  | 2.2744(2)   | 336(12) | Calcite     |
| 40.437(10) | 2.2288(5)   | 186(11) | 40.405(8)  | 2.2305(4)   | 184(10) | Quartz      |
| 41.28(6)   | 2.185(3)    | 89(17)  | -          | -           | -       | Albite      |
| 41.548(14) | 2.1718(7)   | 21(12)  | -          | -           | -       | Albite      |
| 41.95(2)   | 2.1519(12)  | 109(9)  | 41.90(4)   | 2.1542(17)  | 70(13)  | KMgAlSiOH   |
| 42.582(7)  | 2.1214(4)   | 428(13) | 42.573(6)  | 2.1218(3)   | 509(13) | Quartz      |
| 43.346(13) | 2.0858(6)   | 291(15) | -          | -           | -       | Albite      |
| 45.944(7)  | 1.9737(3)   | 821(24) | 45.908(7)  | 1.9752(3)   | 274(44) | Quartz      |
| 47.28(2)   | 1.9209(9)   | 139(19) | -          | -           | -       | Calcite     |
| 47.664(12) | 1.9064(4)   | 306(22) | -          | -           | -       | Calcite     |
| 48.669(10) | 1.8694(4)   | 381(13) | -          | -           | -       | Quartz      |
| 50.274(4)  | 1.81339(14) | 695(23) | 50.247(3)  | 1.81429(10) | 738(17) | Quartz      |
| 50.81(2)   | 1.7955(6)   | 95(24)  | 50.817(14) | 1.7953(5)   | 217(25) | Albite      |
| 51.304(10) | 1.7794(3)   | 90(10)  | 51.254(18) | 1.7810(6)   | 42(7)   | Albite      |
| 55.009(13) | 1.6680(4)   | 228(13) | 55.002(7)  | 1.66815(18) | 326(20) | Quartz      |
| 55.449(14) | 1.6558(4)   | 91(10)  | 55.454(7)  | 1.6556(2)   | 102(25) | Calcite     |

|            |             |         |            |             |         |         |
|------------|-------------|---------|------------|-------------|---------|---------|
| 56.748(15) | 1.6209(4)   | 36(12)  | -          | -           | -       | Calcite |
| 57.602(6)  | 1.59890(16) | 117(13) | -          | -           | -       | Calcite |
| 60.098(4)  | 1.53832(10) | 491(12) | 60.080(4)  | 1.53872(10) | 739(14) | Albite  |
| 60.820(12) | 1.5218(3)   | 117(18) | -          | -           | -       | Calcite |
| 61.78(6)   | 1.5003(12)  | 303(17) | 61.80(2)   | 1.5000(5)   | 206(24) | Quartz  |
| 64.176(18) | 1.4501(4)   | 126(11) | 64.146(16) | 1.4507(3)   | 165(14) | Calcite |
| 64.831(19) | 1.4370(4)   | 122(12) | -          | -           | -       | Calcite |
| 65.76(2)   | 1.4189(4)   | 66(33)  | 65.91(4)   | 1.4160(8)   | 108(17) | Albite  |
| 66.13(4)   | 1.4119(7)   | 40(39)  | -          | -           | -       | Quartz  |
| 67.885(6)  | 1.37956(11) | 286(17) | 67.858(5)  | 1.38005(9)  | 377(13) | Quartz  |
| 68.282(8)  | 1.37251(14) | 522(23) | 68.268(4)  | 1.37276(7)  | 351(40) | Quartz  |
| 69.59(6)   | 1.3499(11)  | 133(20) | 69.59(3)   | 1.3498(6)   | 197(17) | Quartz  |
| 73.610(13) | 1.28577(19) | 270(18) | 73.590(6)  | 1.28606(9)  | 157(12) | Quartz  |
| 75.768(7)  | 1.25442(9)  | 107(9)  | 75.785(12) | 1.25418(16) | 222(12) | Quartz  |
| 77.79(3)   | 1.2268(4)   | 55(11)  | 77.803(16) | 1.2266(2)   | 84(12)  | Quartz  |
| 80.028(9)  | 1.19802(11) | 138(11) | 79.994(10) | 1.19844(13) | 214(11) | Quartz  |
| 81.291(9)  | 1.18257(10) | 116(12) | 81.278(11) | 1.18272(14) | 154(15) | Quartz  |
| 81.617(10) | 1.17867(12) | 135(14) | 81.619(8)  | 1.17864(9)  | 150(17) | Quartz  |
| 83.96(2)   | 1.1516(2)   | 145(13) | 83.944(18) | 1.1518(2)   | 98(9)   | Calcite |

Table S2 Parameters obtained when fitting the experimental data to the non-linear equations of isotherm models

| Model      | Sample | Parameter               | Na <sup>+</sup>       | K <sup>+</sup>        | Cl <sup>-</sup>       |
|------------|--------|-------------------------|-----------------------|-----------------------|-----------------------|
| Langmuir   | S      | q <sub>max</sub> , mg/g | 4.55                  | 7.07                  | 2.31                  |
|            |        | k <sub>L</sub> , l/mg   | -1.99*10 <sup>5</sup> | -2.07*10 <sup>6</sup> | -3.53*10 <sup>4</sup> |
|            |        | R <sup>2</sup>          | -3*10 <sup>-8</sup>   | -2.2*10 <sup>-8</sup> | -6.3*10 <sup>-8</sup> |
|            | AS     | q <sub>max</sub> , mg/g | 6.11                  | 14.79                 | 2.68                  |
|            |        | k <sub>L</sub> , l/mg   | -1.57*10 <sup>7</sup> | -1.27*10 <sup>7</sup> | -4.15*10 <sup>7</sup> |
|            |        | R <sup>2</sup>          | -2.9*10 <sup>-8</sup> | -4.2*10 <sup>-8</sup> | -1*10 <sup>-8</sup>   |
| Freundlich | S      | 1/n                     | 0.9625                | 0.6918                | 0.7243                |
|            |        | n                       | 1.04                  | 1.45                  | 1.38                  |
|            |        | k <sub>f</sub> , mg/g   | 2.88*10 <sup>-3</sup> | 4.54*10 <sup>-2</sup> | 8.79*10 <sup>-3</sup> |
|            |        | R <sup>2</sup>          | 0.9517                | 0.9691                | 0.8633                |
|            |        | q <sub>max</sub> , mg/g | 10.49                 | 16.43                 | 4.20                  |
|            |        | ARE, %                  | 24.24                 | 84.02                 | 89.23                 |

|                      |    |                                             |                      |                      |                      |
|----------------------|----|---------------------------------------------|----------------------|----------------------|----------------------|
|                      | AS | 1/n                                         | 0.7576               | 0.6111               | 0.7291               |
|                      |    | n                                           | 1.32                 | 1.11                 | 1.37                 |
|                      |    | $k_f$ , mg/g                                | $2.36 \cdot 10^{-2}$ | $1.77 \cdot 10^{-2}$ | $1.28 \cdot 10^{-2}$ |
|                      |    | R <sup>2</sup>                              | 0.9814               | 0.9691               | 0.9478               |
|                      |    | q <sub>max</sub> , mg/g                     | 16.07                | 31.64                | 5.96                 |
|                      |    | ARE, %                                      | 22.07                | 97.14                | 46.57                |
| Temkin               | S  | $A_t$ , l/g                                 | $0.61 \cdot 10^{-2}$ | $2.65 \cdot 10^{-2}$ | $2.27 \cdot 10^{-3}$ |
|                      |    | $b_t$ , J/mol                               | 1076.39              | 994.51               | 1521.85              |
|                      |    | R <sup>2</sup>                              | 0.7664               | 0.7594               | 0.9572               |
|                      |    | q <sub>max</sub> , mg/g                     | 7.86                 | 12.19                | 3.96                 |
|                      | AS | $A_t$ , l/g                                 | $2.89 \cdot 10^{-2}$ | $3.06 \cdot 10^{-2}$ | $2.57 \cdot 10^{-2}$ |
|                      |    | $b_t$ , J/mol                               | 1185.56              | 499.67               | 2593.69              |
|                      |    | R <sup>2</sup>                              | 0.7216               | 0.7997               | 0.7187               |
|                      |    | q <sub>max</sub> , mg/g                     | 10.67                | 24.81                | 4.55                 |
|                      |    |                                             |                      |                      |                      |
| Dubinin-Radushkevich | S  | $q_s$ , mg/g                                | 12.44                | 14.27                | 3.78                 |
|                      |    | $\beta$ , mol <sup>2</sup> /kJ <sup>2</sup> | 0.8918               | 0.1512               | 0.1922               |
|                      |    | R <sup>2</sup>                              | 0.8367               | 0.9790               | 0.9952               |
|                      |    | E, J/mol                                    | 0.75                 | 1.82                 | 1.61                 |
|                      |    | q <sub>max</sub> , mg/g                     | 7.99                 | 13.24                | 3.44                 |
|                      |    | ARE, %                                      | 53.11                | 40.99                | 18.31                |
|                      | AS | $q_s$ , mg/g                                | 13.26                | 27.53                | 5.73                 |
|                      |    | $\beta$ , mol <sup>2</sup> /kJ <sup>2</sup> | 0.2587               | 0.0991               | 0.012                |
|                      |    | R <sup>2</sup>                              | 0.9454               | 0.9727               | 0.9889               |
|                      |    | E, J/mol                                    | 1.39                 | 2.25                 | 6.46                 |
|                      |    | q <sub>max</sub> , mg/g                     | 11.72                | 25.28                | 5.18                 |
|                      |    | ARE, %                                      | 49.19                | 37.27                | 40.93                |
|                      |    |                                             |                      |                      |                      |
